# Supplementary material for: Cell-Type-Specific Gene Regulatory Networks Underlying Murine Neonatal Heart Regeneration at Single-Cell Resolution
Source: PubMed Central journal article supplement — Cell Rep. Author manuscript; Available in PMC 2020 Dec 31. (PMC7774872; doi:10.1016/j.celrep.2020.108472), 2020-12-08
Supplement: NIHMS1653540-supplement-1.pdf [file NIHMS1653540-supplement-1.pdf]

**Cell Reports, Volume 33**

**Supplemental Information**

**Cell-Type-Specific Gene Regulatory  
Networks Underlying Murine Neonatal Heart  
Regeneration at Single-Cell Resolution**

**Zhaoning Wang, Miao Cui, Akansha M. Shah, Wei Tan, Ning Liu, Rhonda Bassel-  
Duby, and Eric N. Olson**



**Figure S1. Single cell RNA-seq (scRNA-seq) identifies composition and transcription landscapes of different cardiac cells, Related to Figure 1.**

- A. Heatmap showing the expression of top enriched genes for each cell cluster identified in the scRNA-seq data.
- B. Macrophage infiltration in regenerating and non-regenerating neonatal hearts. Sections from 1d- and 3d- post MI/Sham hearts were stained for F4/80 (macrophage marker, red), cardiac troponin T (cTnT, CM marker, green) and nuclei were counterstained with Hoechst (blue). Representative images were shown from n=4 individual sections collected from n=2 animals for each timepoint and condition. Compared with age-matched sham controls, more macrophages (indicated by arrowheads) can be detected in infarct and border zones of MI hearts at all timepoints examined. Scale bar, 50  $\mu$ m.
- C. Expansion of epicardial cells in regenerating and non-regenerating neonatal hearts. Sections from 1d- and 3d- post MI/Sham hearts were stained for Msln (epicardial cell marker, red), cardiac troponin T (cTnT, CM marker, green) and nuclei were counterstained with Hoechst (blue). Representative images were shown from n=4 individual sections collected from n=2 animals for each timepoint and condition. The expansion of epicardial cells and their morphological changes were observed adjacent to the infarct region of post-MI hearts at all timepoints examined. Scale bar, 50  $\mu$ m.

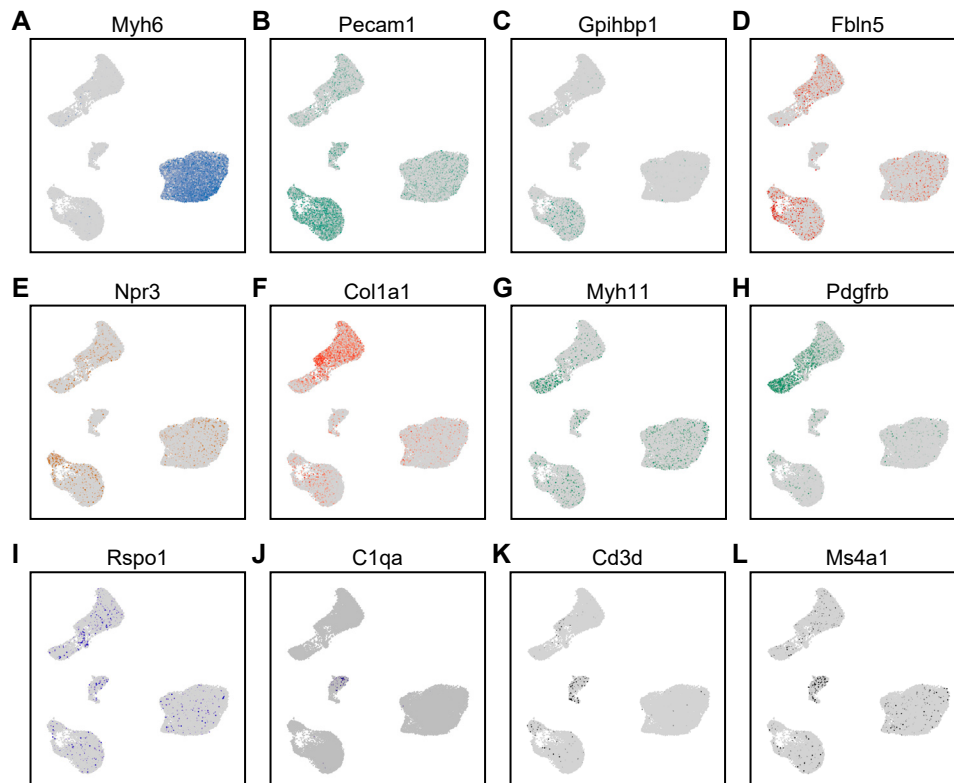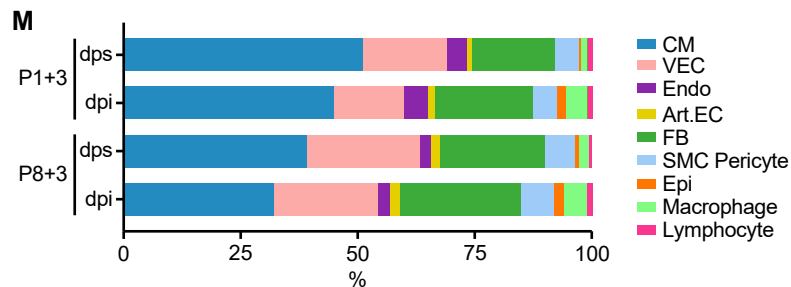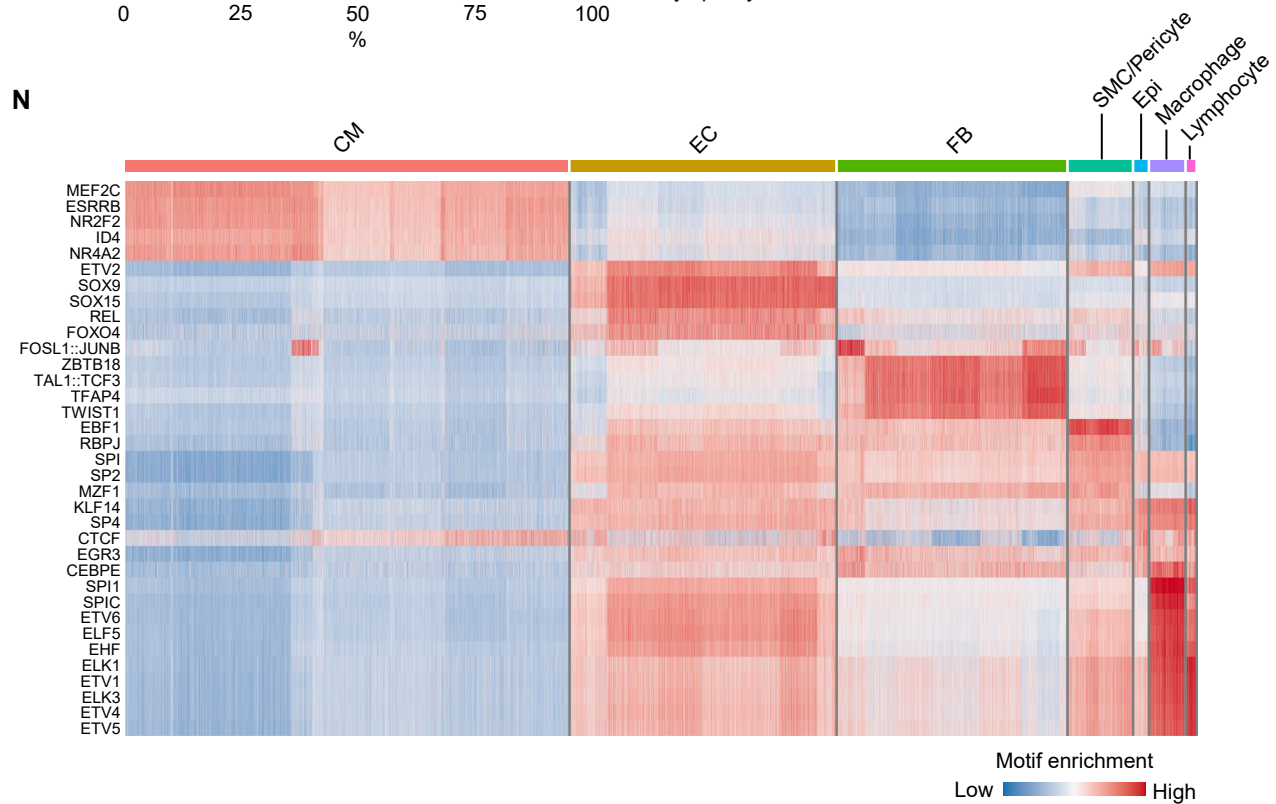

Figure S2

**Figure S2. A single cell atlas of open chromatin landscapes of neonatal hearts,  
Related to Figure 2.**

- A. UMAP plot showing the gene activity (chromatin accessibility at promoter and gene body regions) of *Myh6*, a CM marker gene.
- B. UMAP plot showing the gene activity of *Pecam1*, a pan-EC marker gene.
- C. UMAP plot showing the gene activity of *Gpihbp1*, a capillary EC marker gene
- D. UMAP plots showing the gene activity of *Fbln5*, an artery EC marker gene.
- E. UMAP plot showing the gene activity of *Npr3*, an endocardial cell marker gene.
- F. UMAP plot showing the gene activity of *Col1a1*, a FB marker gene.
- G. UMAP plot showing the gene activity of *Myh11*, a SMC marker gene.
- H. UMAP plot showing the gene activity of *Pdgfrb*, a pericyte marker gene.
- I. UMAP plot showing the gene activity of *Rspo1*, an epicardial cell marker gene.
- J. UMAP plot showing the gene activity of *C1qa*, a macrophage marker gene.
- K. UMAP plot showing the gene activity of *Cd3d*, a T cell marker gene.
- L. UMAP plot showing the gene activity of *Ms4a1*, a B cell marker gene.
- M. Percentage of each cell type within each scATAC-seq sample.
- N. Heatmap showing the relative enrichment of selected top enriched TF binding motifs for each cell cluster.

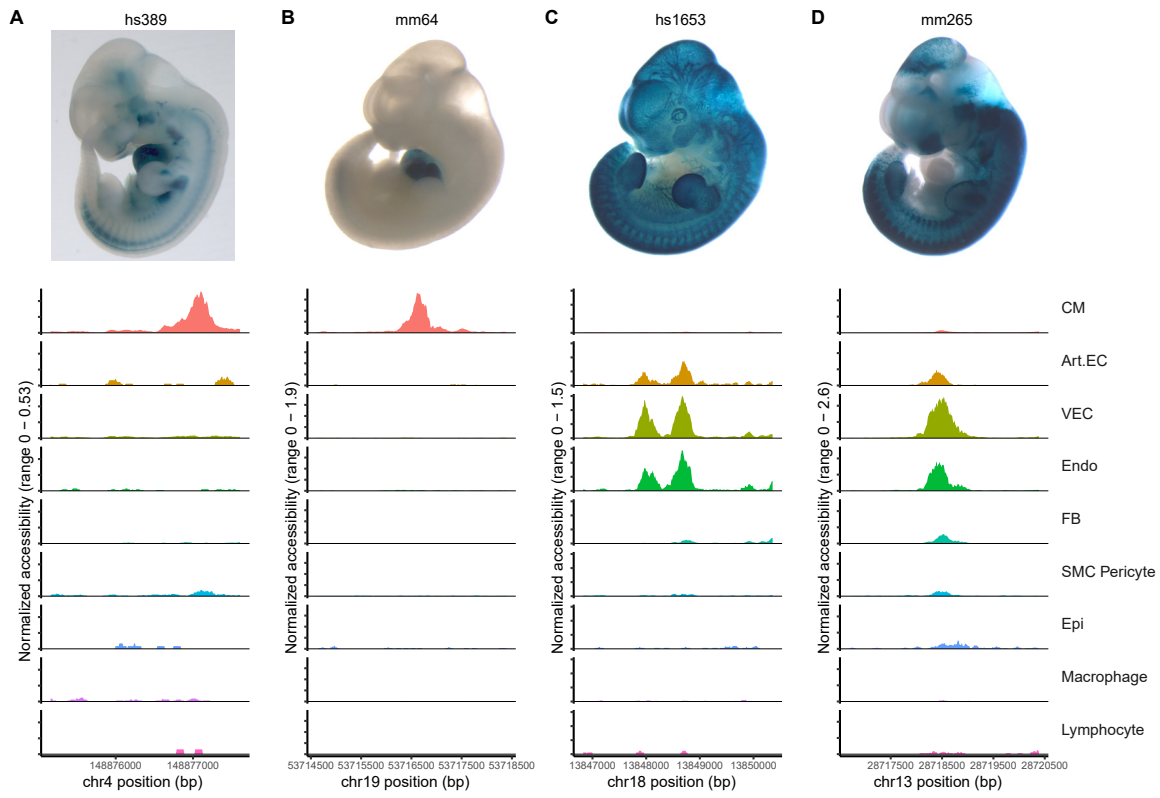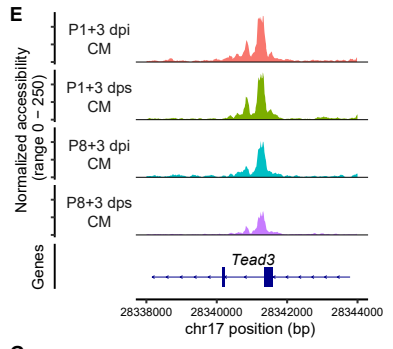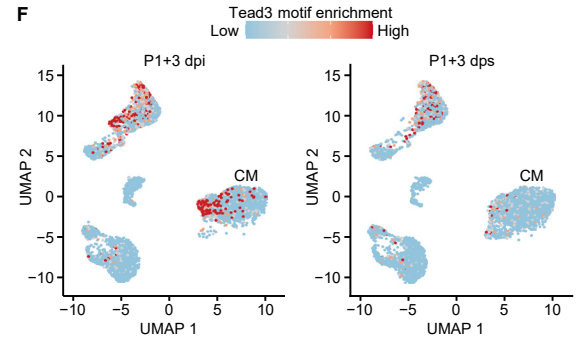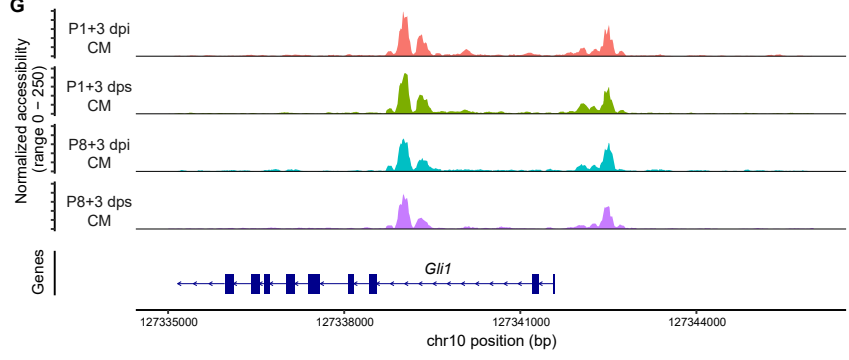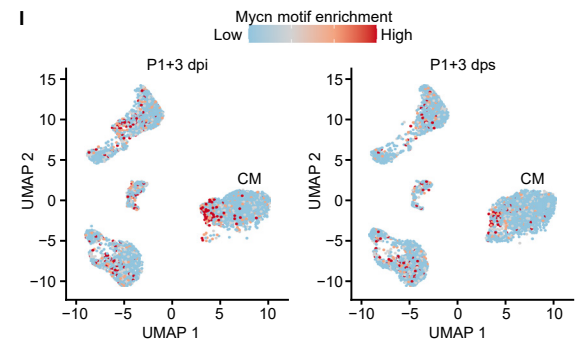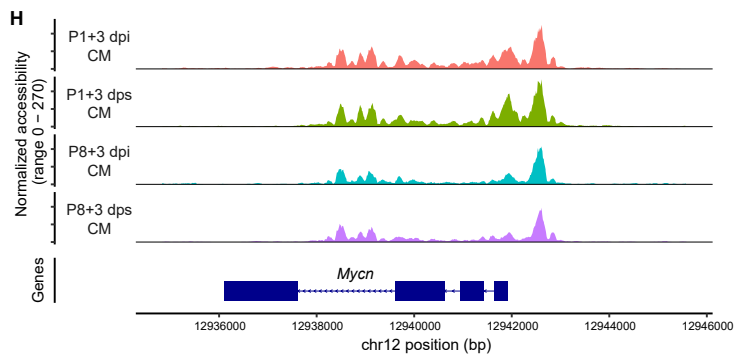

Figure S3

**Figure S3. Validation of scATAC-seq with VISTA enhancers and known transcription factors involved in CM proliferation, Related to Figure 2 and Figure 3.**

A-D. Upper, representative transgenic embryo carrying VISTA enhancer elements hs389 (A, n=3), mm64 (B, n=6), hs1653 (C, n=5), and mm265 (D, n=3) with LacZ reporter staining indicating enhancer activity in the heart or blood vessels; lower, scATAC-seq tracks of genomic regions surrounding candidate VISTA enhancer elements. Embryo images were used with permission from VISTA Enhancer Browser Program of Lawrence Berkeley National Laboratory (<https://enhancer.lbl.gov/>).

E. scATAC-seq tracks from CMs of different samples showing the chromatin accessibility of a *Tead3* enhancer in the gene body region.

F. chromVAR analysis showing the enrichment of Tead3 motif (MA0808.1) in open chromatin regions of single cells from P1+3 dpi and P1+3 dps samples. There are more CMs with high Tead3 motif enrichment from P1+3 dpi sample than P1+3 dps sample.

G. scATAC-seq tracks from CMs of different samples showing the chromatin accessibility in the promoter region of *Gli1*.

H. scATAC-seq tracks from CMs of different samples showing the chromatin accessibility in *Mycn* gene body.

I. chromVAR analysis showing the enrichment of Mycn motif (MA0104.4) in open chromatin regions of single cells from P1+3 dpi and P1+3 dps samples. There are more CMs with high Mycn motif enrichment from P1+3 dpi sample than P1+3 dps sample.

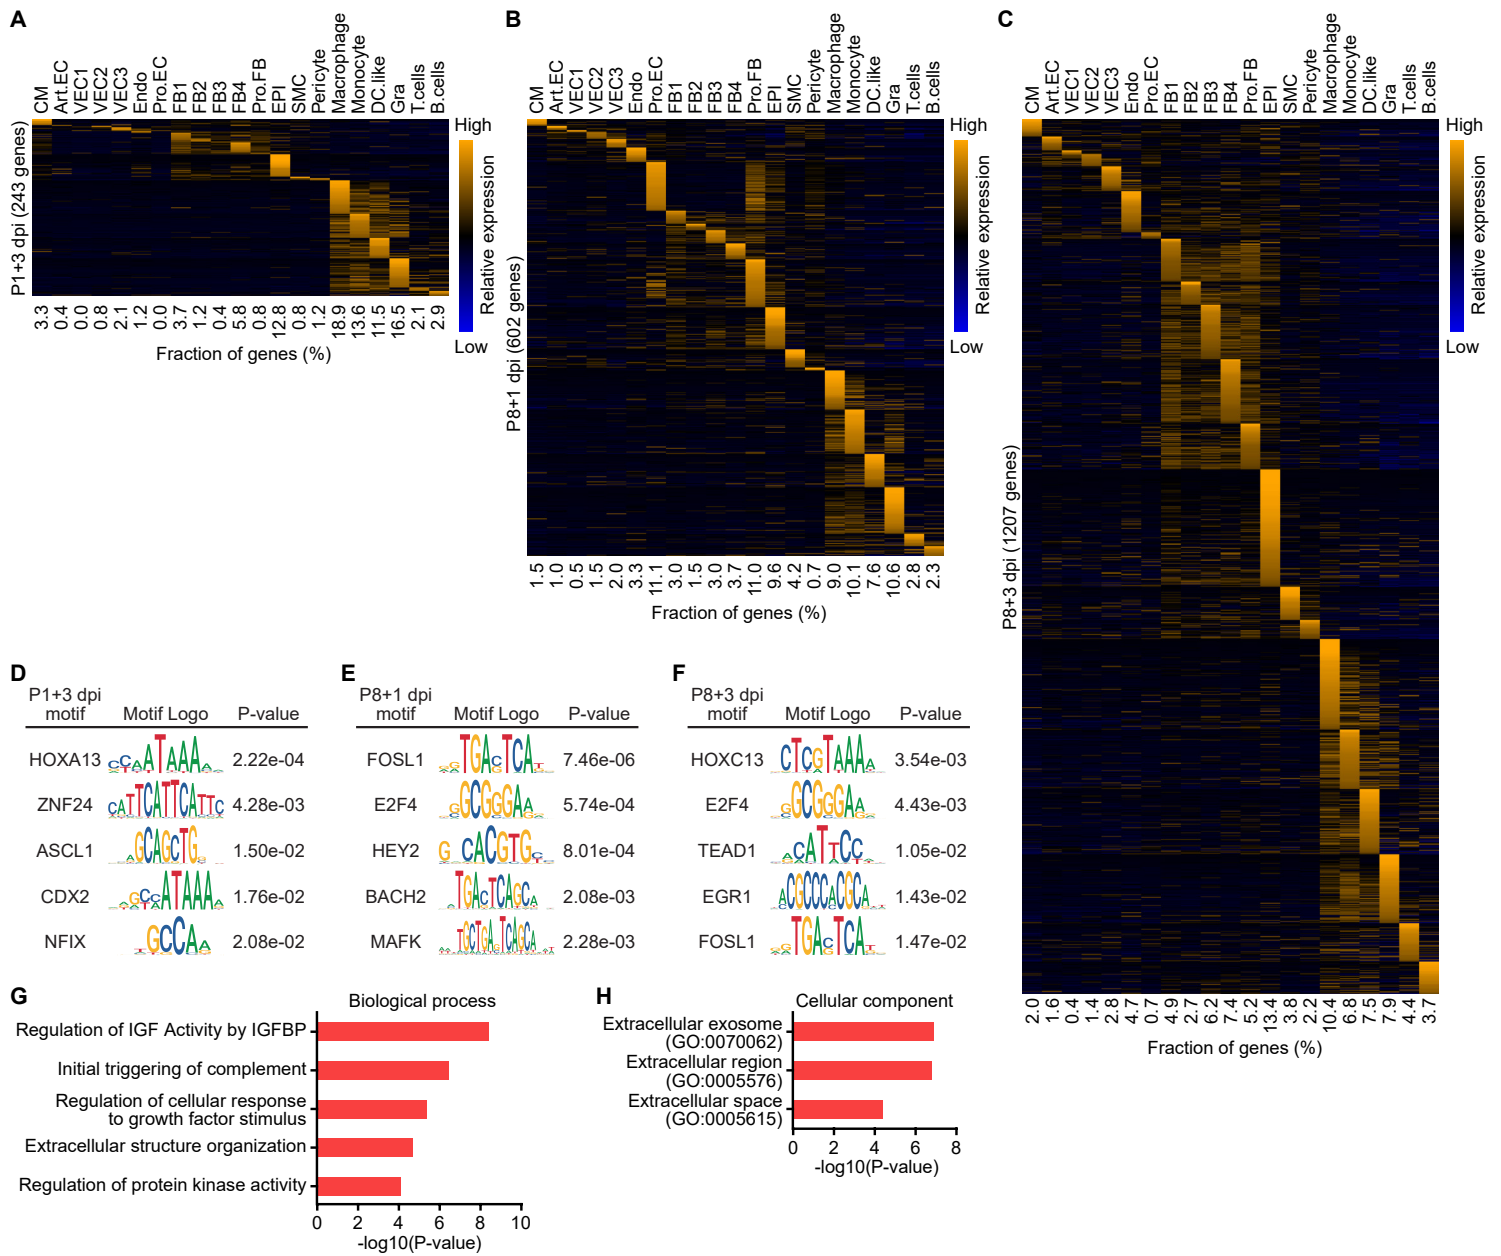

Figure S4



**Figure S4. Unique epicardial features in the post-MI responses of P1 and P8 hearts,  
Related to Figure 4.**

A-C. Heatmaps showing expression of cell type-specific, injury-induced genes across different cell types at P1+3 dpi (A), P8+1 dpi (B), and P8+3 dpi (C).

D-F. Tables summarizing TF motifs enriched in open chromatin regions that are associated with epicardial-specific, MI-induced genes at P1+3 dpi (D), P8+1 dpi (E), and P8+3 dpi (F).

G. Biological processes enriched for epicardial-specific, MI-induced genes at P1+1 dpi.

H. Cellular components enriched for epicardial-specific, MI-induced genes at P1+1 dpi.

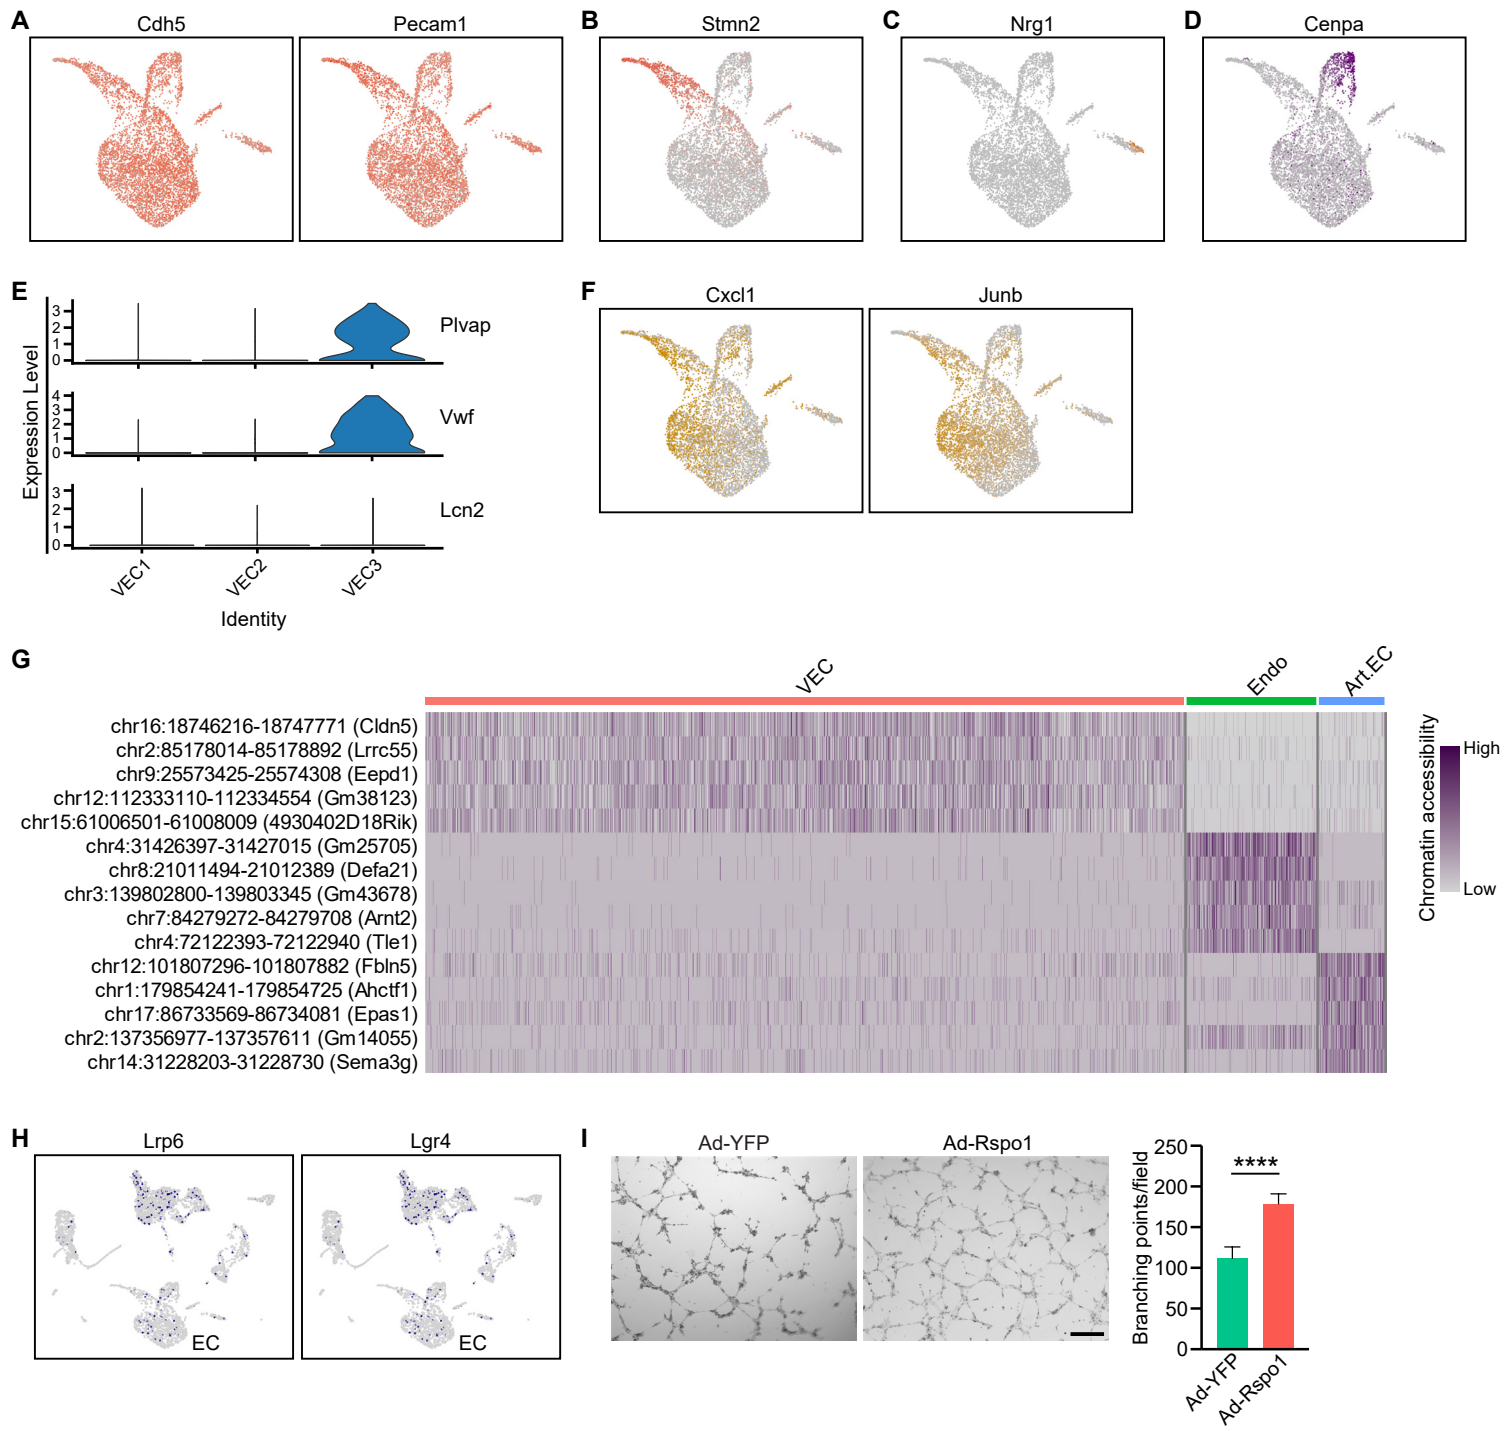

Figure S5

**Figure S5. Heterogenous ECs during neonatal heart regeneration, Related to Figure 5.**

- A. UMAP plots showing the expression of *Cdh5* (left), and *Pecam1* (right), two canonical marker genes for ECs, in all ECs analyzed.
- B-D. UMAP plots showing the expression of artery EC marker gene *Stmn5* (B), endocardial cell marker gene *Nrg1* (C) and cell cycle-related gene *Cenpa* (D) in ECs.
- E. Stacked violin plots showing expression of venous EC enriched genes *Plvap*, *Vwf* and *Lcn2* across VEC1, VEC2 and VEC3 sub-populations. Note that *Lcn2* is a large venous marker identified in (Kalucka et al., 2020).
- F. UMAP plots showing expression of VEC2 enriched genes *Cxcl1* (left) and *Junb* (right) in ECs.
- G. Heatmap showing accessibility of open chromatin regions enriched in VEC, Endo, and Art.EC clusters, revealed by scATAC-seq.
- H. UMAP plots showing the expression of RSPO1 receptor genes *Lrp6* (left) and *Lgr4* (right) among different cell types present in the P1+1 dpi and dps scRNA-seq data.
- I. Representative images showing the *in vitro* HUVEC tube formation assay using HUVEC cells pre-infected with YFP (left) or *Rspo1* (middle) adenovirus, after 8 h culture in the Matrigel, with quantifications (right) showing the number of branching points per field under each treatment (n=16 per each group; \*\*\*\*, p<0.0001). Scale bar, 500  $\mu$ m.

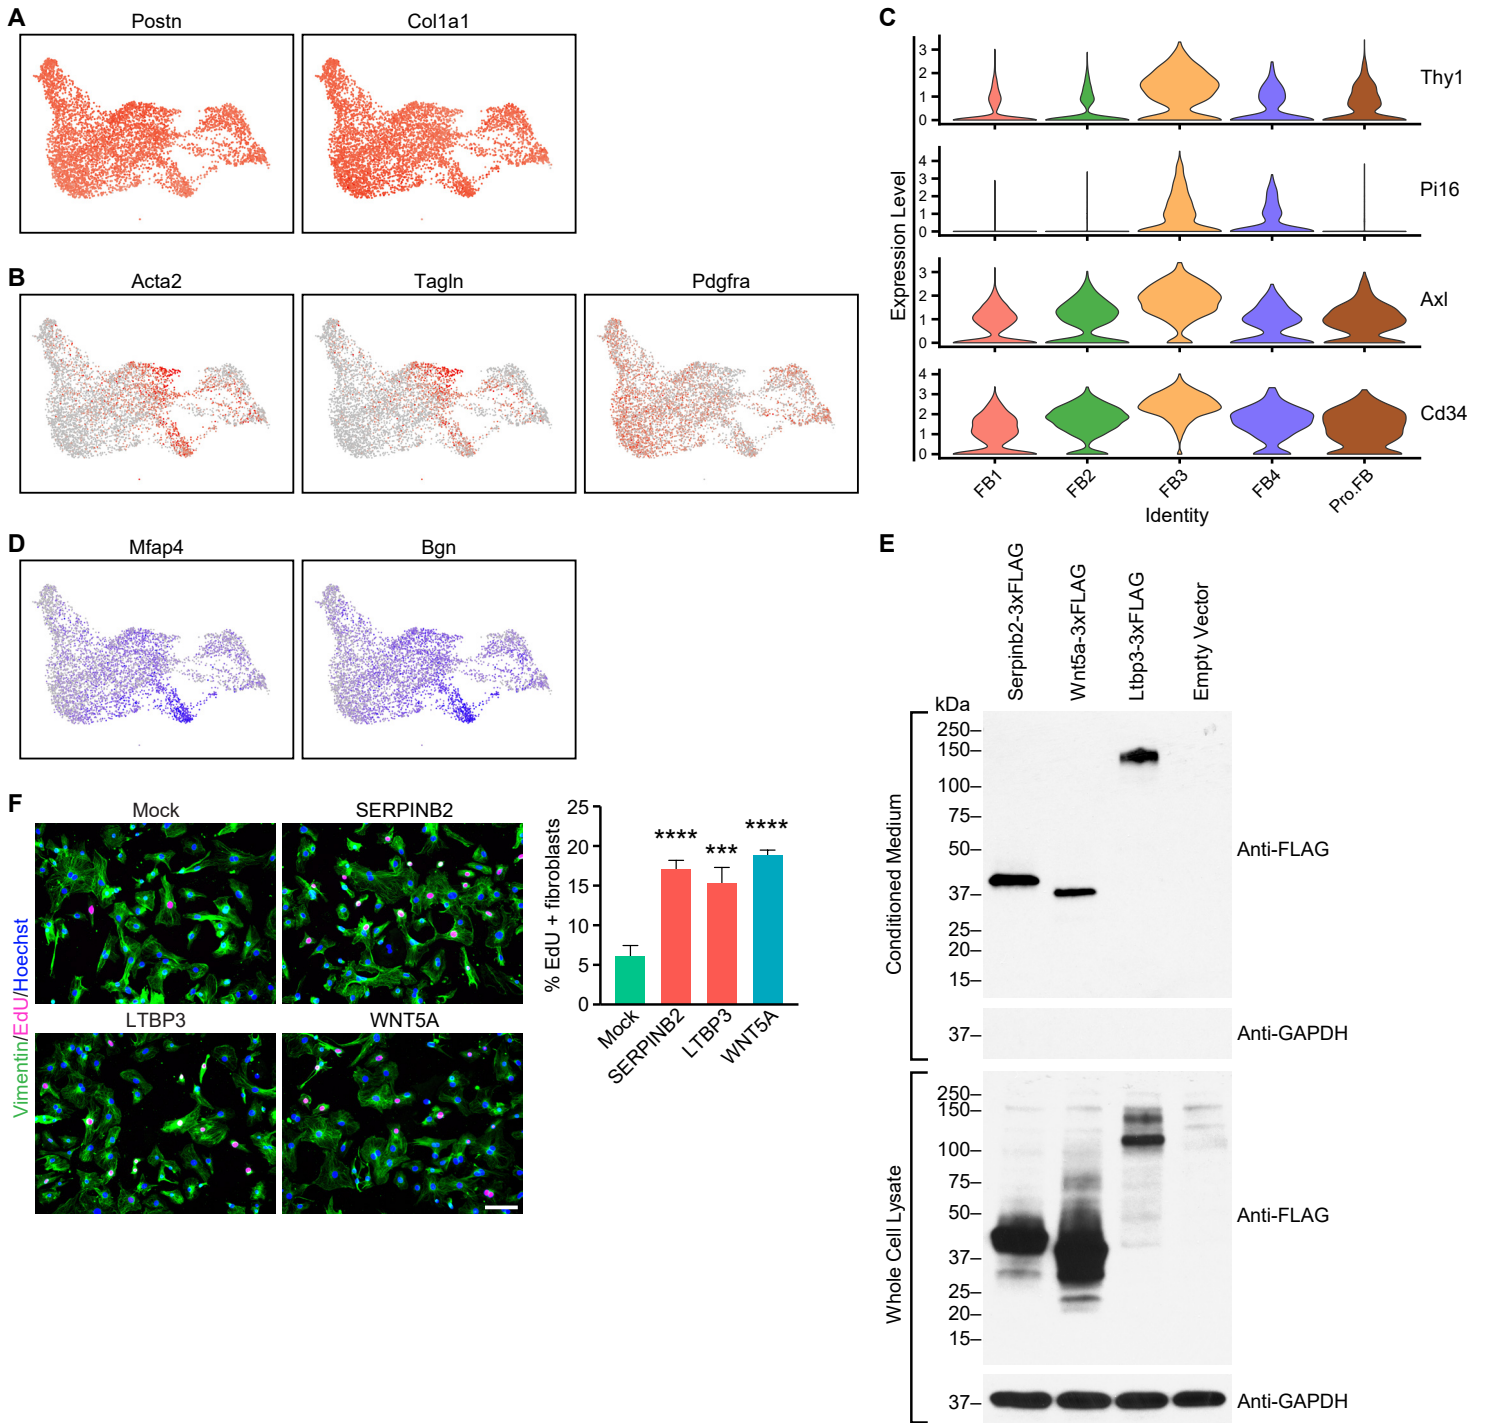

Figure S6

**Figure S6. Heterogeneous fibroblasts in the neonatal heart, Related to Figure 6.**

- A. UMAP plots showing the expression of *Postn* (left) and *Col1a1* (right), two marker genes for fibroblasts, in all FBs analyzed.
- B. UMAP plots showing the expression of *Acta2* (left), *Tagln* (middle), and *Pdgfra* (right) in FBs.
- C. Stacked violin plots showing the expression of *Thy1*, *Pi16*, *Axl* and *Cd34*, across different FB sub-populations.
- D. UMAP plots showing the expression of *Mfap4* (left) and *Bgn* (right) in FBs.
- E. Western blot analysis showing the expression and secretion of candidate secreted factors. *Serpinb2*, *Wnt5a* and *Ltbp3* were tagged with 3xFLAG at the C' terminus, and transfected into 293A cells. Filtered cell culture medium (conditioned medium) or whole cell lysate was collected for each group for western blot analysis using anti-FLAG antibody, or anti-GAPDH antibody (as negative control for secretion and positive loading control for whole cell lysates).
- F. Representative images showing EdU incorporation (magenta) and vimentin immunofluorescent staining (green) of NRCF cells treated with conditioned medium from 293A cells transfected with empty vector (Mock control), or vectors for *Serpinb2* or *Ltbp3*, or vector for *Wnt5a* (positive control), with quantification showing the proportion of EdU positive cells among vimentin positive fibroblasts (n=4 per each group; \*\*\*\*, p<0.0001). Scale bar, 100  $\mu$ m.

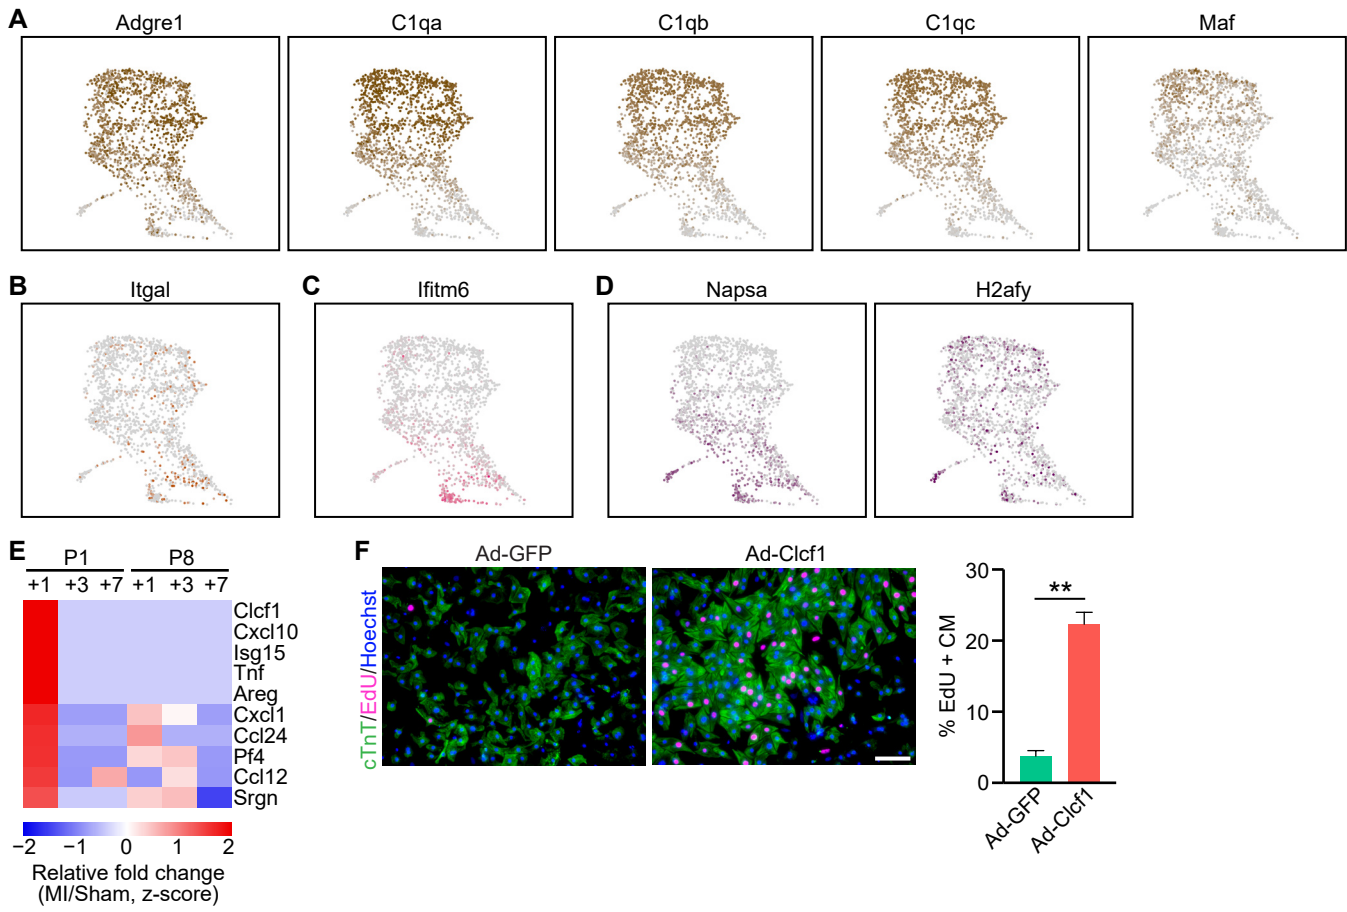

Figure S7

**Figure S7. Heterogeneous immune cells and cell-type specific injury response during neonatal heart regeneration, Related to Figure 7.**

- A. UMAP plots showing the expression of *Adgre1*, *C1qa*, *C1qb*, *C1qc*, and *Maf* in all myeloid cells analyzed.
- B. UMAP plot showing the expression of *Itgal*, a monocyte marker gene, in myeloid cells.
- C. UMAP plot showing the expression of *Ifitm6*, a gene enriched in M1 monocytes, in myeloid cells.
- D. UMAP plots showing the expression of *Napsa* (left) and *H2afy* (right), marker genes for DC-like cells, in myeloid cells.
- E. Heatmap showing relative fold change of various P1-unique, macrophage-specific genes at various timepoints after P1 or P8 MI, detected by bulk RNA-seq.
- F. EdU incorporation (magenta) and cTnT immunostaining (green) of NRVM cells overexpressing GFP (left) or *Clcf1* (middle) using adenoviral delivery, with quantifications (right) showing the proportion of EdU positive cells among cTnT positive cells (CMs) (n=2 per each group; \*\*, p<0.01). Scale bar, 100  $\mu$ m.
